# Supplementary material for: Polysarcosine functionalised cationic polyesters efficiently deliver self-amplifying mRNA
Source: Royal Society of Chemistry journal article supplement (doi:10.1039/d4py00064a), 2024-01-01
Supplement: d4py00064a1.pdf [file d4py00064a1.pdf]

## Supporting Information

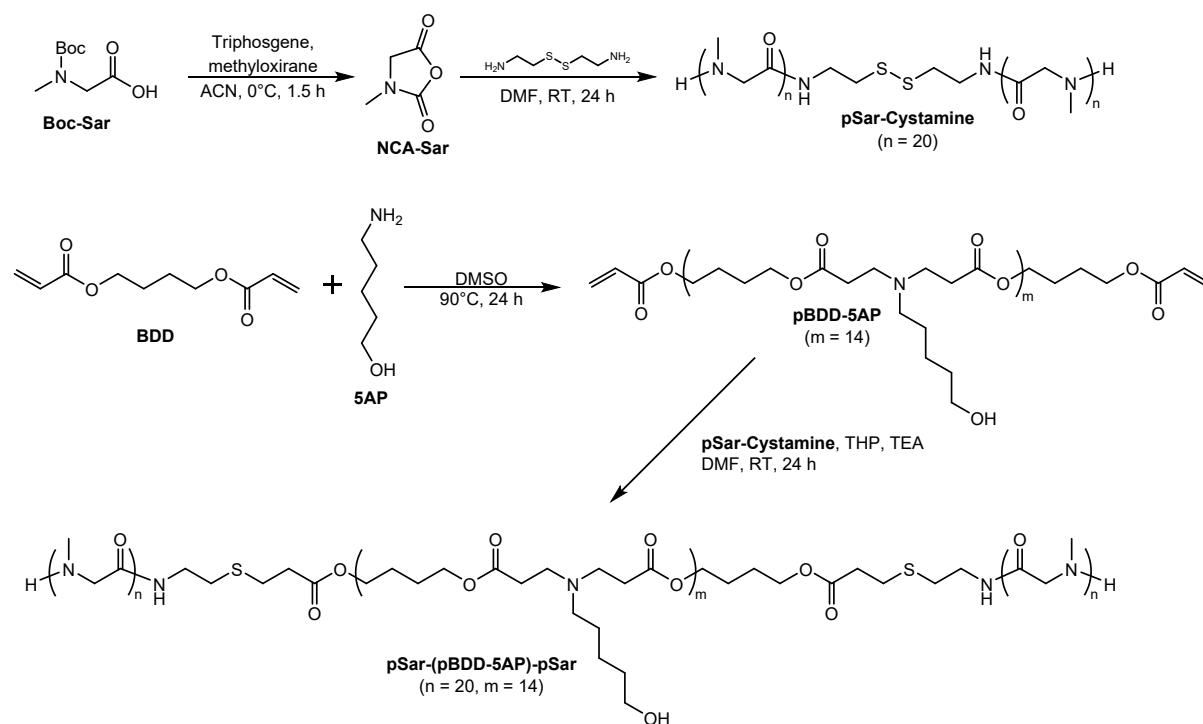

**Scheme S1.** Synthesis scheme of the final block copolymer pSar-(pBDD-5AP)-pSar.

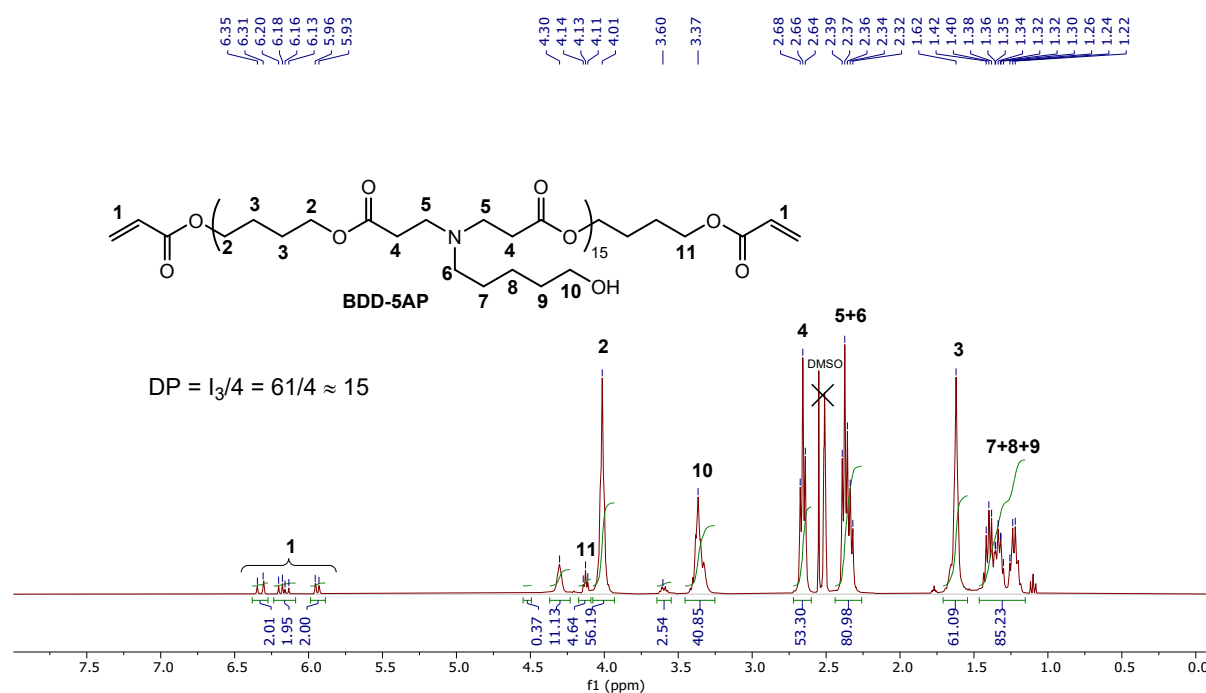

**Spectrum S1.**  $^1\text{H}$  NMR (400 MHz,  $\text{DMSO-d}_6$ ) of pBDD-5AP.

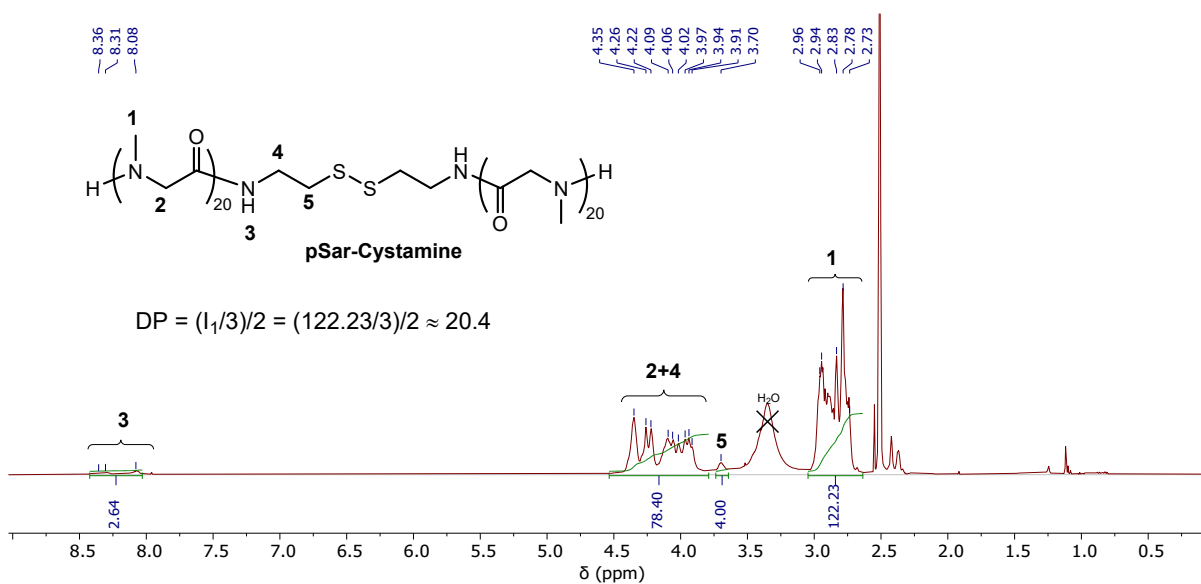

**Spectrum S2.**  $^1H$  NMR (400 MHz, DMSO- $d_6$ ) of pSar-Cystamine.

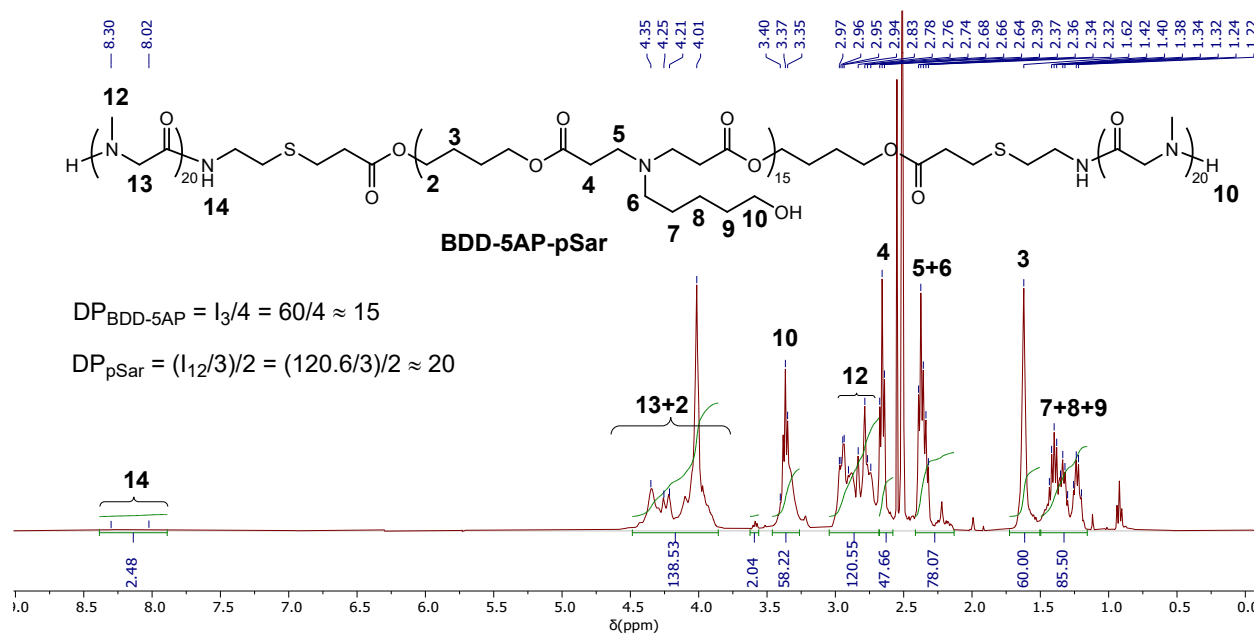

**Spectrum S3.**  $^1H$  NMR (400 MHz, DMSO- $d_6$ ) of pSar-(pBDD-5AP)-pSar.

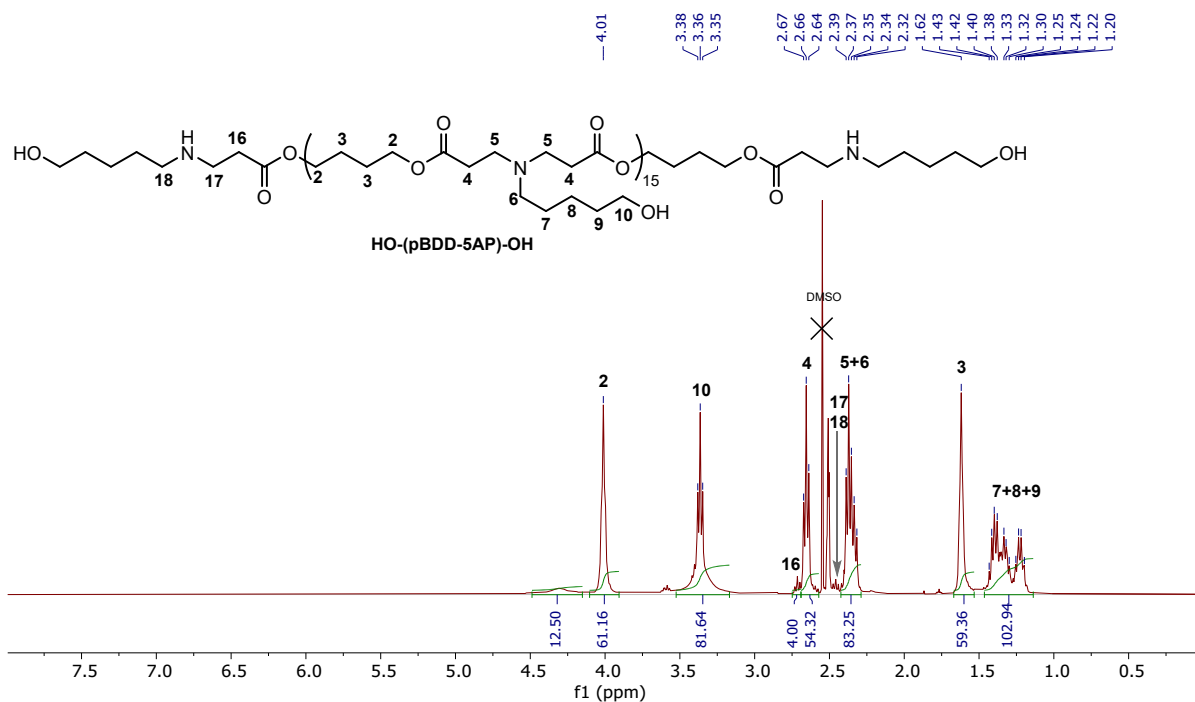

**Spectrum S4.**  $^1\text{H}$  NMR (400 MHz,  $\text{DMSO-d}_6$ ) of HO-(pBDD-5AP)-OH.

**Table S1.** Buffering capacity of studied polymers defined as an amount of an acid required to change pH from 7.4 to 5.0, normalised either to the weight of polymer or mol of ionisable nitrogens.

| Polymer              | Buffering capacity, weight normalised (mmol $\text{H}^+$ /g) | Buffering capacity, mol of ionisable nitrogen normalised |
|----------------------|--------------------------------------------------------------|----------------------------------------------------------|
| PEI                  | 24                                                           | 12                                                       |
| OH-(pBDD-5AP)-OH     | 8                                                            | 4.0                                                      |
| pSar-(pBDD-5AP)-pSar | 7                                                            | 3.5                                                      |

**Table S2.** Comparison of w/w ratio and N/P ratio of OH-(pBDD-5AP)-OH and pSar-(pBDD-5AP)-pSar

| Polymer              | DNA/PBAE w/w ratio | N/P ratio |
|----------------------|--------------------|-----------|
| OH-(pBDD-5AP)-OH     | 32                 | 35        |
|                      | 64                 | 70        |
|                      | 128                | 140       |
| pSar-(pBDD-5AP)-pSar | 32                 | 22.5      |
|                      | 64                 | 45        |
|                      | 128                | 90        |

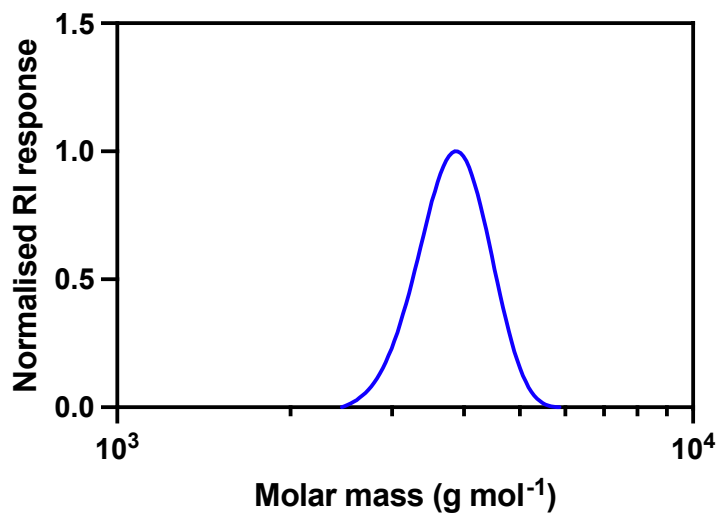

**Figure S1.** DMF-SEC chromatogram of pSar-Cystamine

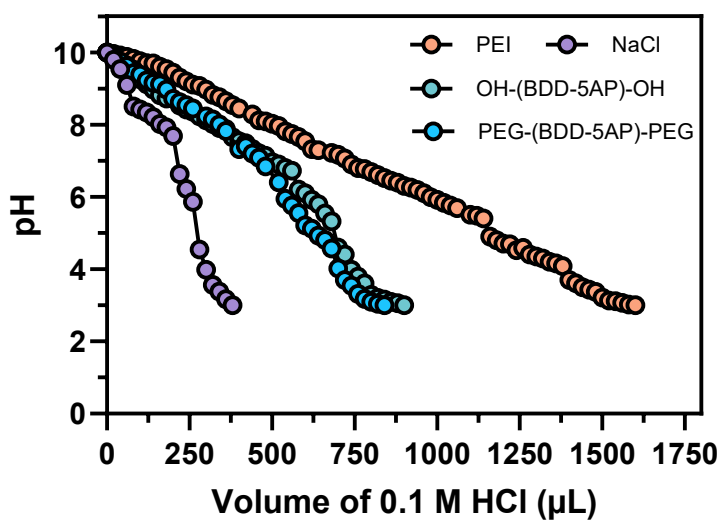

**Figure S2.** Buffering capacity of OH-(pBDD-5AP)-OH and pSar-(pBDD-5AP)-pSar compared to polyethylene imine (PEI) and negative control of a 0.1 M NaCl<sub>(aq)</sub> solution.
